# Supplementary material for: Interplay between Sublethal Aminoglycosides and Quorum Sensing: Consequences on Survival in V. cholerae
Source: Cells. 2021 Nov 18;10(11):3227. doi: 10.3390/cells10113227 (PMC8621022; doi:10.3390/cells10113227)
Supplement: Supplementary file 1 [file cells-10-03227-s001.zip › cells-1426447-supplementary.pdf]

Article

# Interplay between sublethal aminoglycosides and quorum sensing: consequences on survival in *V. cholerae*

André Carvalho <sup>1,2,†</sup>, Evelyne Krin <sup>1,†</sup>, Chloé Korlowski <sup>1</sup>, Didier Mazel <sup>1,\*</sup> and Zeynep Baharoglu <sup>1,\*</sup>

## Supplementary Materials

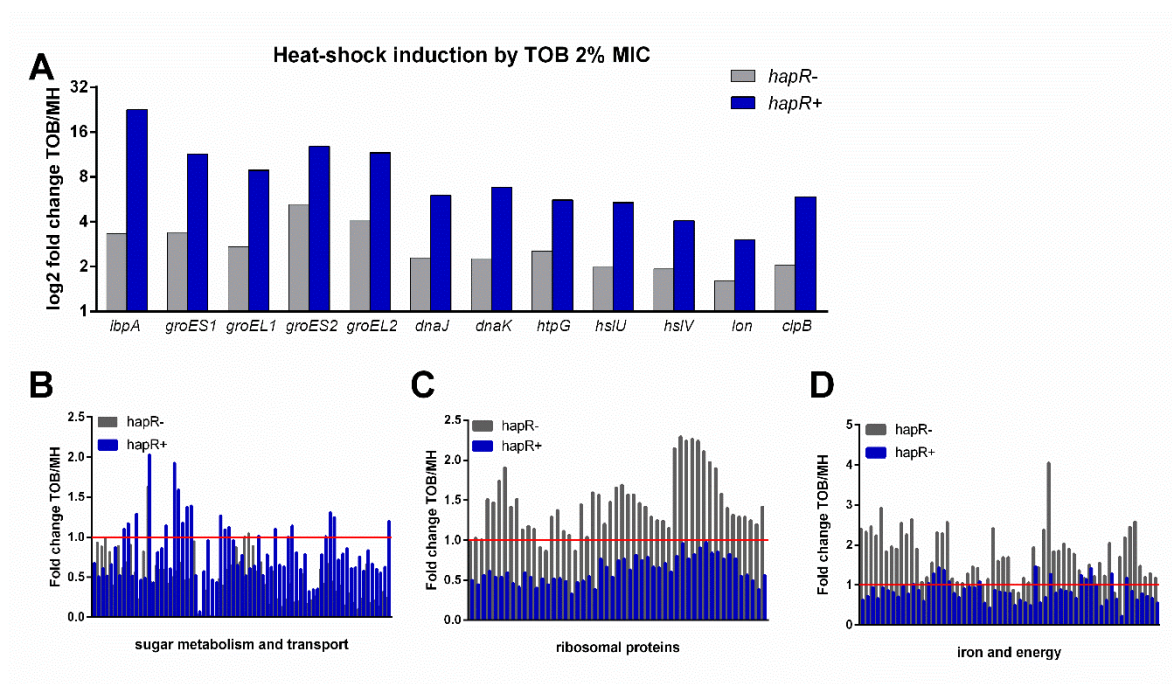

**Figure S1.** Fold change values of several members of the heat-shock regulon induced by subMIC TOB in the different QS background contexts.

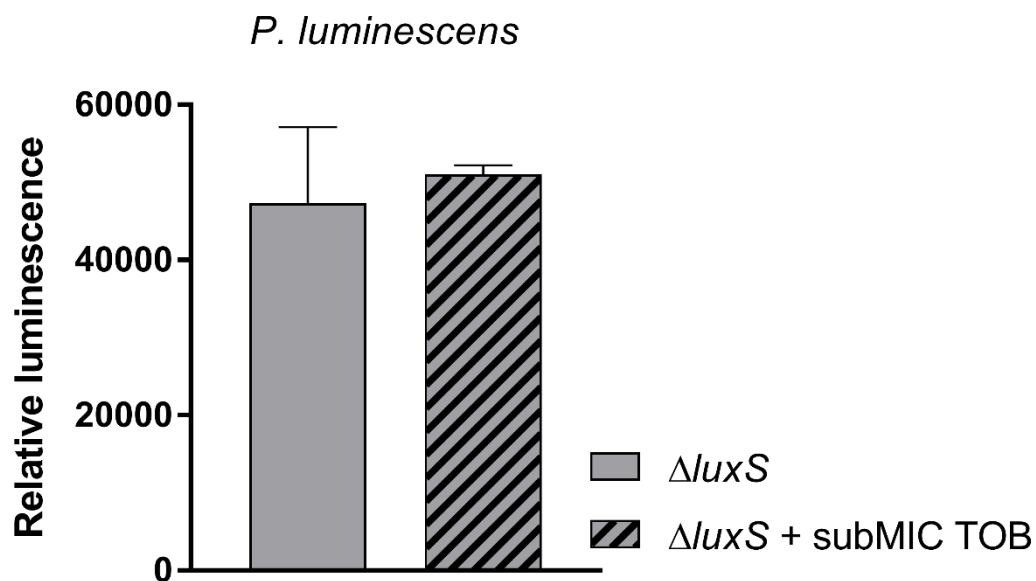

Figure S2. subMIC TOB (50% MIC) fails to affect luminescence of a *P. luminescens*  $\Delta luxS$  strain.

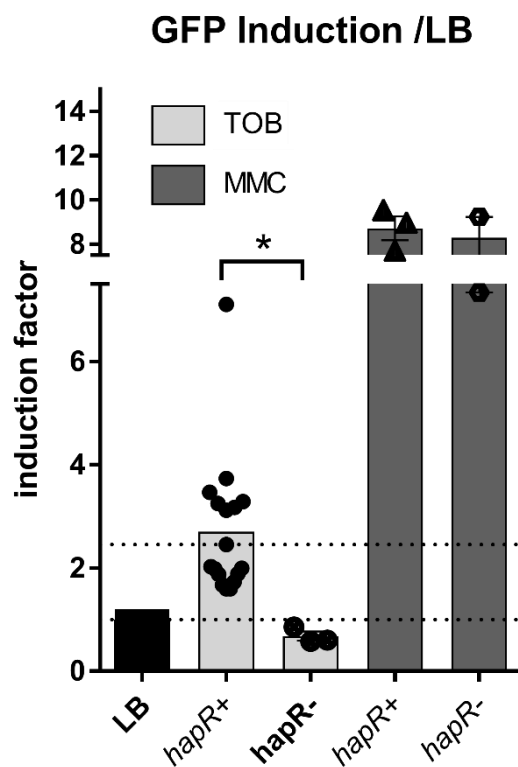

Figure S3. SOS induction in both hapR- and hapR+ context of *V. cholerae* by sub inhibitory concentrations of tobramycin (TOB) or mitomycin C (MMC).

**Table S1.** Primers used in this study.

| Name   | Sequence                                                                  |
|--------|---------------------------------------------------------------------------|
| ZB47   | CCCGTTCCATACAGAAGCTGGGCGAACAAACGATGCTCGC                                  |
| ZB48   | GACATTATTTGCCGACTACCTTGGTGATCTCGCCTTTCACG                                 |
| ZIP413 | AAACGTGATGAAATTCATCAGTTGCG                                                |
| ZIP414 | GCGAGCATCGTTTGTTGCGCCAGCTTCTGTATGGAACGGGCACCGACCCGTGTCTTCTACC             |
| ZIP415 | CGTGAAAGGCGAGATCACCAAGGTAGTCGGCAAATAATGTCGCGATGAGAGAATGGATCAACC           |
| ZIP416 | GAATATGGACCTGCAGGACGAATGAGC                                               |
| ZIP81  | GCCAACGATGGTAGTGAAGTGCTCAAGC                                              |
| ZIP82  | GCGAGCATCGTTTGTTGCGCCAGCTTCTGTATGGAACGGGATGCATAAATAACAAAACTGCTAAACG       |
| ZIP83  | CGTGAAAGGCGAGATCACCAAGGTAGTCGGCAAATAATGTCCGCAATATATCCTAGTTATAAAAAATTTAACG |
| ZIP84  | TGACAGGGGCTTTAGCGGGCATTGCC                                                |
| ZIP87  | AAGTGGTACTGGAAGGTCGCAAGC                                                  |
| ZIP88  | GCGAGCATCGTTTGTTGCGCCAGCTTCTGTATGGAACGGGTTCTTTCTCCCTTCTGGCTCGC            |
| ZIP89  | CGTGAAAGGCGAGATCACCAAGGTAGTCGGCAAATAATGTCGTCGGTTCTGTAAACGTTAAAAATACAAAAGC |
| ZIP90  | GGTACACCGCTTAACGTTCACTGC                                                  |
| ZIP191 | CGTGACTGGAGATAAAACGCAGATCTGG                                              |
| ZIP192 | GCGAGCATCGTTTGTTGCGCCAGCTTCTGTATGGAACGGGAACAAGATTCAGCAGCACGTATTGC         |
| ZIP193 | CGTGAAAGGCGAGATCACCAAGGTAGTCGGCAAATAATGTCCTATCAGAAACAGCGGAGATATTAGC       |
| ZIP194 | TCACCAAACAGCGCCGATTCAACGG                                                 |
